# Supplementary material for: Characterization of PcLEA14, a Group 5 Late Embryogenesis Abundant Protein Gene from Pear (Pyrus communis)
Source: PubMed Central journal article supplement (PMC7570135; doi:10.3390/plants9091138), 2020-09-03
Supplement: plants-09-01138-s001.pdf [file plants-09-01138-s001.pdf]

Table S1. List of primer sequences

---

| Gene            | Sequences of forward (1st line) and reverse (2nd line) primers |
|-----------------|----------------------------------------------------------------|
| <i>AtActin</i>  | 5'-ACATTGTGCTCAGTGGTGGA-3'<br>5'-GAGATCCAACATCTGCTGGAAT-3'     |
| <i>PcActin</i>  | 5'-GATGACGAAAGAGATTACAGCCTTG-3'<br>5'-CCCCGCTTGCTTTGTTTG-3'    |
| <i>PcGAPDH</i>  | 5'-AGGCTGGAATTGCATTGAAC-3'<br>5'-AGATTTAGCAGGTGGACGCTAC-3'     |
| <i>PcLEA14</i>  | 5'-TTGGTTGTAGGTTTGCGTTTG-3'<br>5'-ATGGCTGTAGGGATTGGTCA-3'      |
| <i>AtLEA14</i>  | 5'-ACTTGGCCAAAGTCTCTGTCAC-3'<br>5'-CCGTCATGTCCTTAGCTTTCAG-3'   |
| <i>PcDREB1A</i> | 5'-TGGAGCTTCTCAAATTGAATCC-3'<br>5'-CAATTGCAAGCCTACACACAAC-3'   |
| <i>PcDREB1B</i> | 5'-CTACCGAAACACACACTGAACTC-3'<br>5'-GGAGGAATCGGAGATTTGAC-3'    |
| <i>PcDREB1C</i> | 5'-GAACTGGGATGATATGGGAAG-3'<br>5'-GTGTCCTTAGGGATGATGAATAC-3'   |
| <i>PcDREB1D</i> | 5'-AAGAGTCGGATGAGGCTTGTG-3'<br>5'-CGCTTCCTCATCCAGAAAATG-3'     |
| <i>PcDREB1E</i> | 5'-GTCGGCTTCGGAGACCAG-3'<br>5'-GGTGCCGTGTCTCTTAAACTTC-3'       |

---

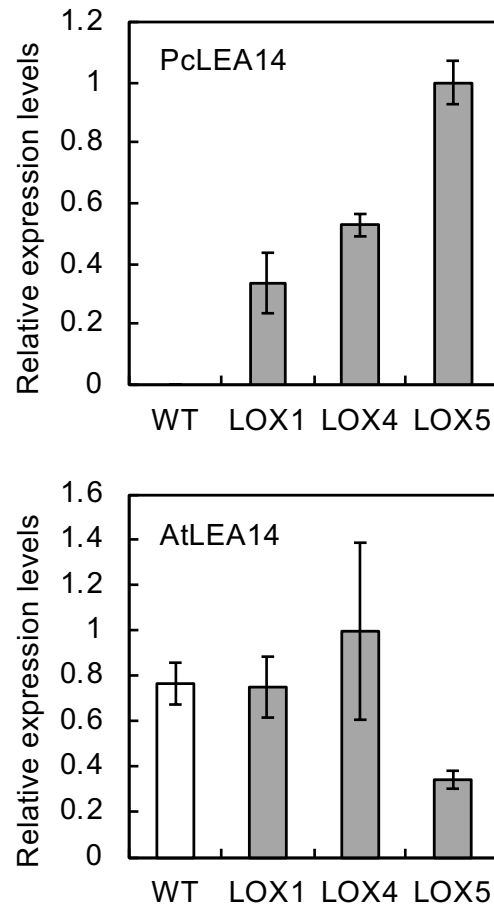

Supplementary Figure S1. mRNA levels of *PcLEA14* and *AtLEA14* in LOX lines of transgenic *Arabidopsis* expressing *PcLEA14*. *AtLEA14* is the endogenous LEA14 gene in *Arabidopsis* and WT indicates wild-type. Each value was determined from three independent biological replicates. Data show the relative expression levels normalized against *AtActin*. Values indicate the means  $\pm$  standard error ( $n = 3$ ).
